# Supplementary material
Source: PubMed Central journal article supplement (PMC5436545)
Supplement: jciinsight-2-89729-s001.pdf [file jciinsight-2-89729-s001.pdf]

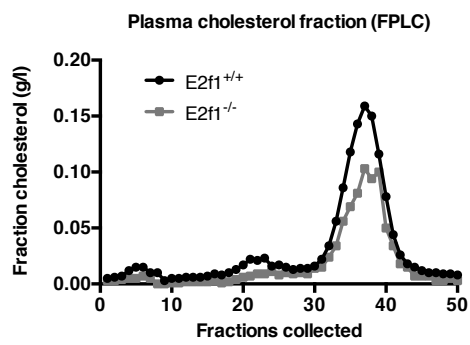

**Supplemental Figure 1:** FPLC separation of pooled plasma cholesterol in *E2f1<sup>+/+</sup>* and *E2f1<sup>-/-</sup>* chow-fed mice. Pool of the plasma of 5 mice.

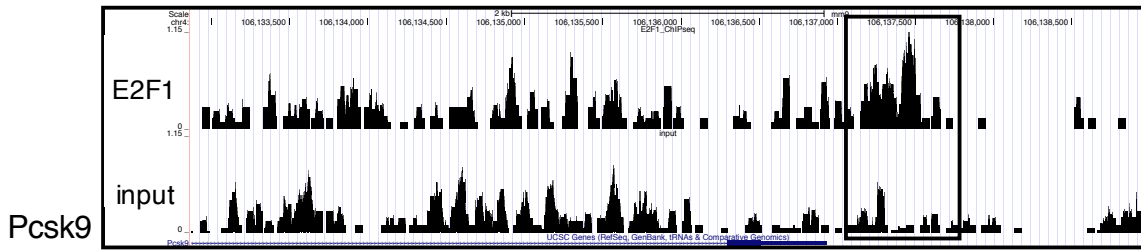

**Supplemental Figure 2. E2F1 ChIP-seq browser shot performed in primary culture of hepatocytesAd-E2F1**

Browser shots from the UCSC genome browser website: <http://genome.ucsc.edu/>. Input and E2F1 ChIP alignments are shown on Mouse genome (NCBL37/mm9) with USCC genes predictions. E2F1 peak from *Pcsk9* promoter is highlighted

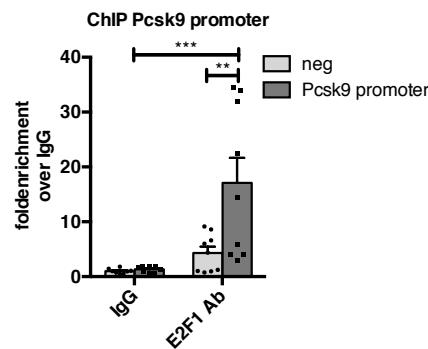

**Supplemental Figure 3. E2F1 ChIP analysis**

Endogenous E2F1 ChIP on *Pcsk9* promoter in HepG2 cells. Results are represented as chromatin enrichment compared to IgG. E2F1 binding to a negative DNA region is represented as control. 4 independent experiments performed in duplicate or triplicate. Differences between conditions were determined by 2-way ANOVA. \*\* $P < 0.01$ , \*\*\* $P < 0.001$ .

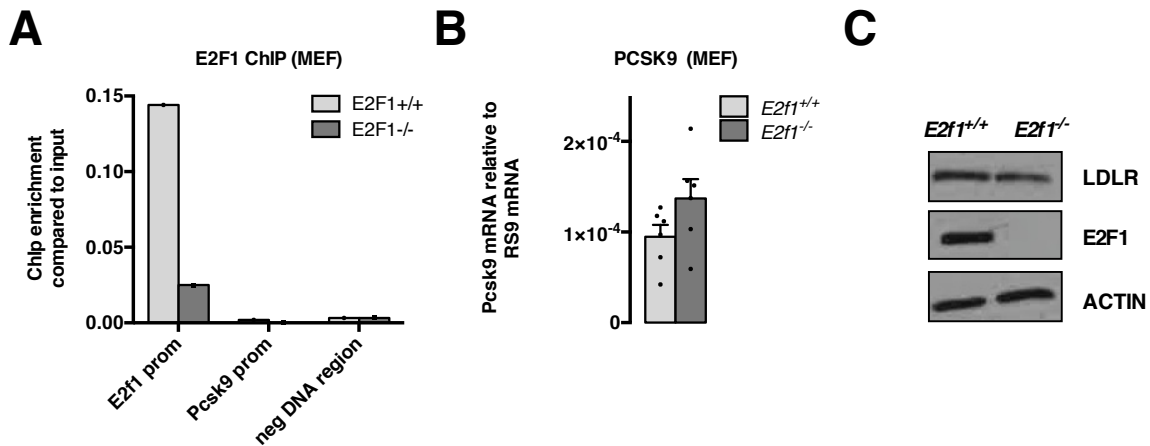

**Supplemental Figure 4. E2F1 ChIP analysis**

(A) Representative E2F1 ChIP experiment performed in *E2f1*<sup>+/+</sup> and *E2f1*<sup>-/-</sup> Mouse Embryonic fibroblates (MEF).

(B) PCSK9 expression in *E2f1*<sup>+/+</sup> and *E2f1*<sup>-/-</sup> MEFs. n=3 experiments in duplicate.

(C) Images of LDLR, E2F1 and ACTIN western blots from *E2f1*<sup>+/+</sup> and *E2f1*<sup>-/-</sup> MEFs.

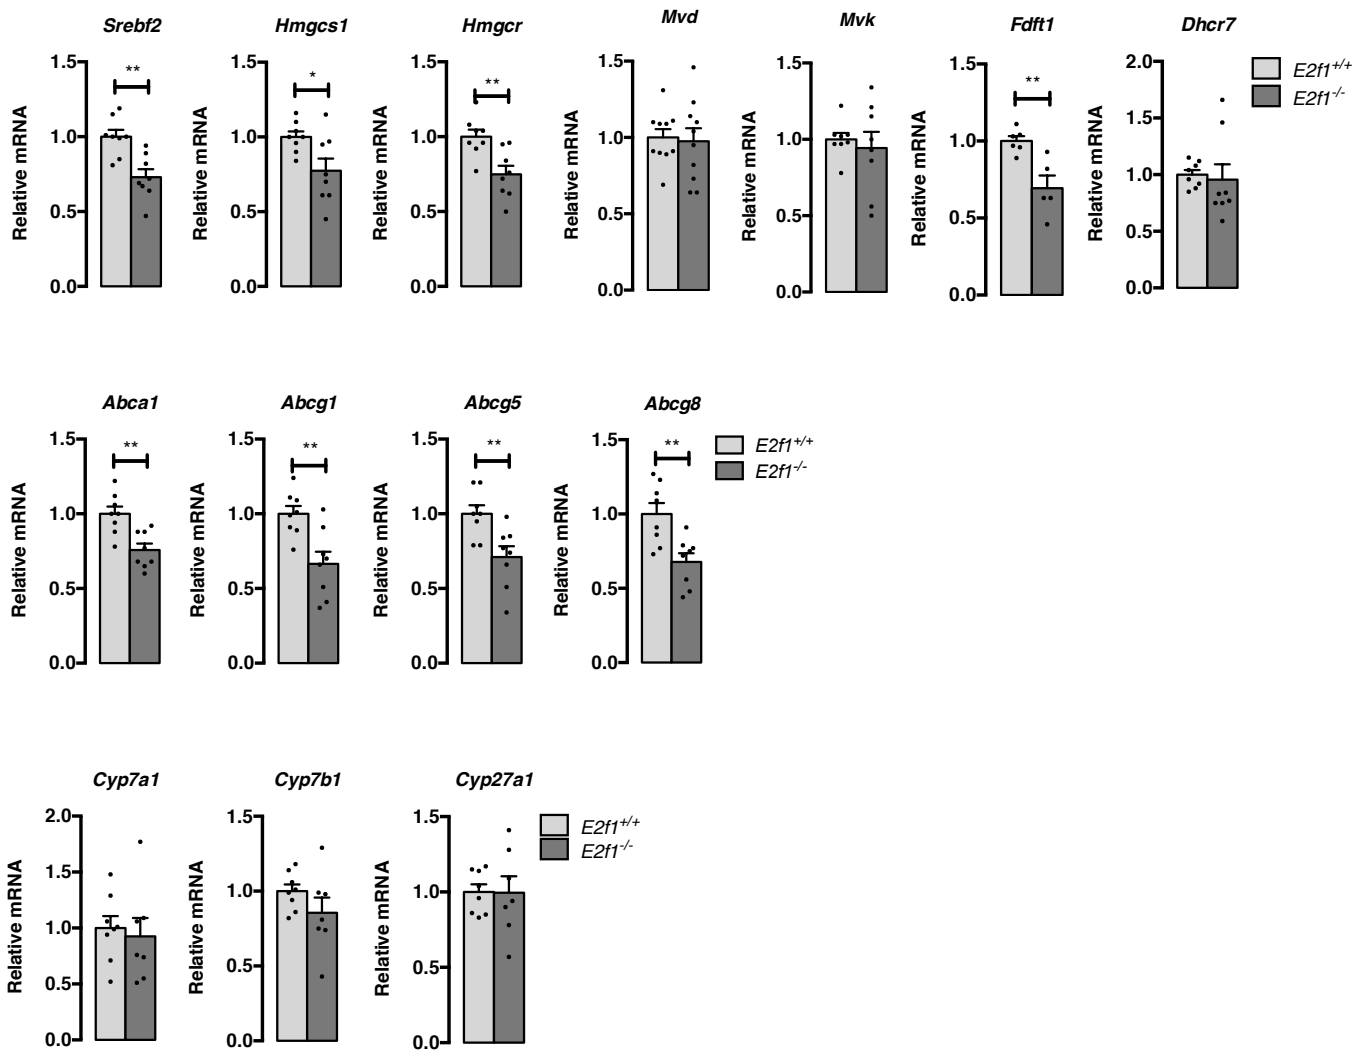

**Supplemental Figure 5:** Relative mRNA expression of cholesterol synthesis related genes, cholesterol /BA transporters genes, and bile acid (BA) synthesis related genes in primary culture of hepatocytes (n=3-4 cultures in duplicate). Differences between  $E2f1^{+/+}$  and  $E2f1^{-/-}$  were determined by 2-tailed unpaired t-test. \*P<0.05, \*\*P<0.01.

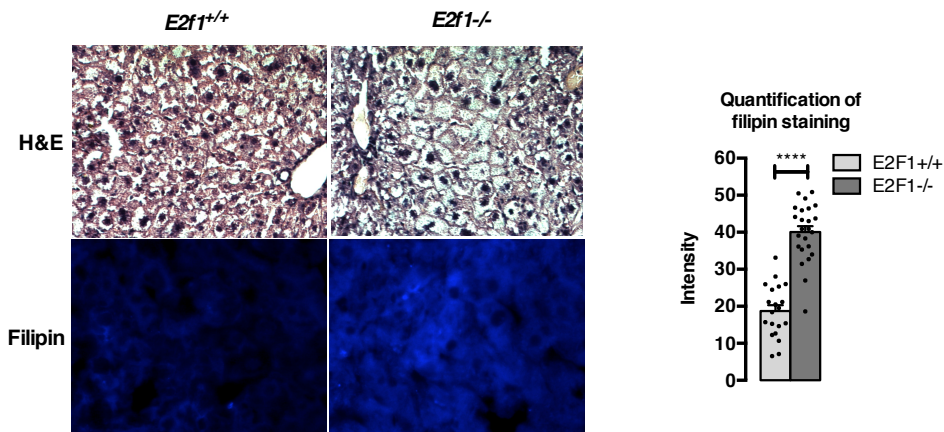

**Supplemental Figure 6:** H&E and filipin staining of *E2f1*<sup>+/+</sup> and *E2f1*<sup>-/-</sup> liver sections (Original magnification 100X). Quantification of the intensity of filipin staining is represented. Differences between *E2f1*<sup>+/+</sup> and *E2f1*<sup>-/-</sup> were determined by 2-tailed unpaired t-test. \*\*\*\*P<0,0001.

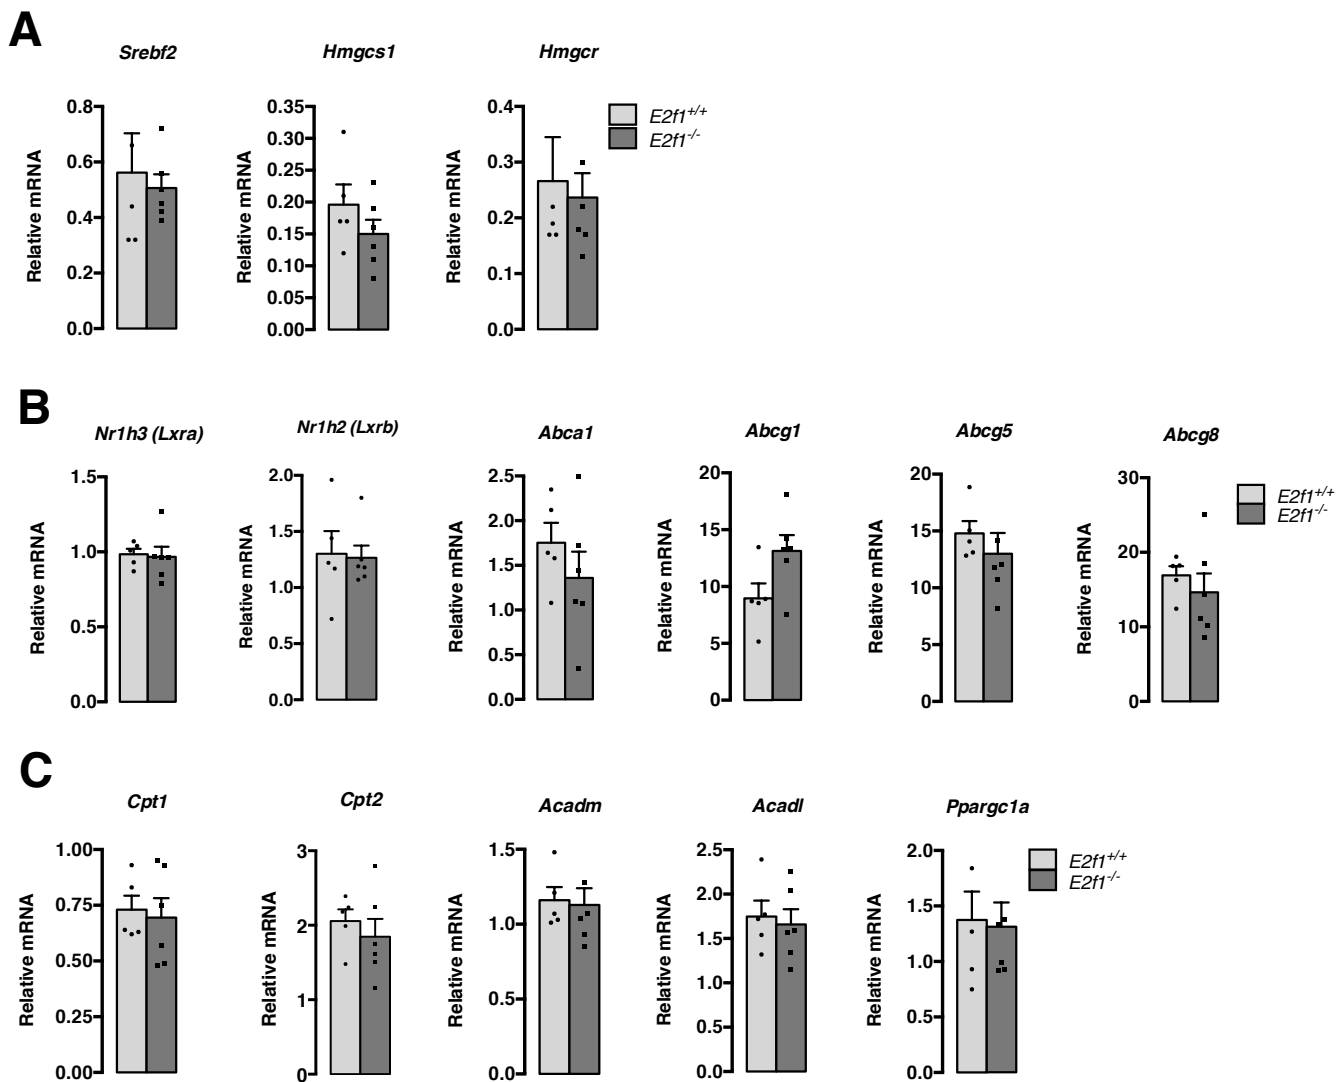

**Supplemental Figure 7:** Liver gene expression of *E2f1*<sup>+/+</sup> and *E2f1*<sup>-/-</sup> mice after 5 weeks of HCD. (A) cholesterol related genes expression, (B) LXR target genes expression and (C)  $\beta$ -oxidation related genes expression are represented. n=5-6 mice per group. Differences between *E2f1*<sup>+/+</sup> and *E2f1*<sup>-/-</sup> were determined by 2-tailed unpaired t-test.

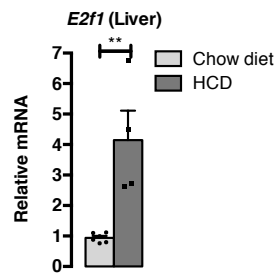

**Supplemental Figure 8:** Relative expression of *E2f1* mRNA in the livers of E2F1<sup>+/+</sup> and E2F1<sup>-/-</sup> mice that were fed with either standard chow or high cholesterol diet (HCD) for five weeks. All data are presented as the mean  $\pm$  SEM. n=4-6 mice per group. Differences between chow diet and HCD were determined by 2-tailed unpaired t-test. \*\*P<0,005.

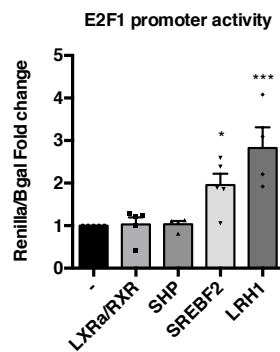

**Supplemental Figure 9:** Human *E2F1* promoter activity in HepG2 cells transfected with empty vector (-), NR1H3/RXRA (LXR $\alpha$ /RXR), NR0B2 (SHP), SREBF2 or NR5A2 (LRH1). Cells were co-transfected with cmv- $\beta$ gal plasmid for normalization. Differences with the empty vector condition were determined by one-way ANOVA. \*P<0.05, \*\*\*P<0.0005.

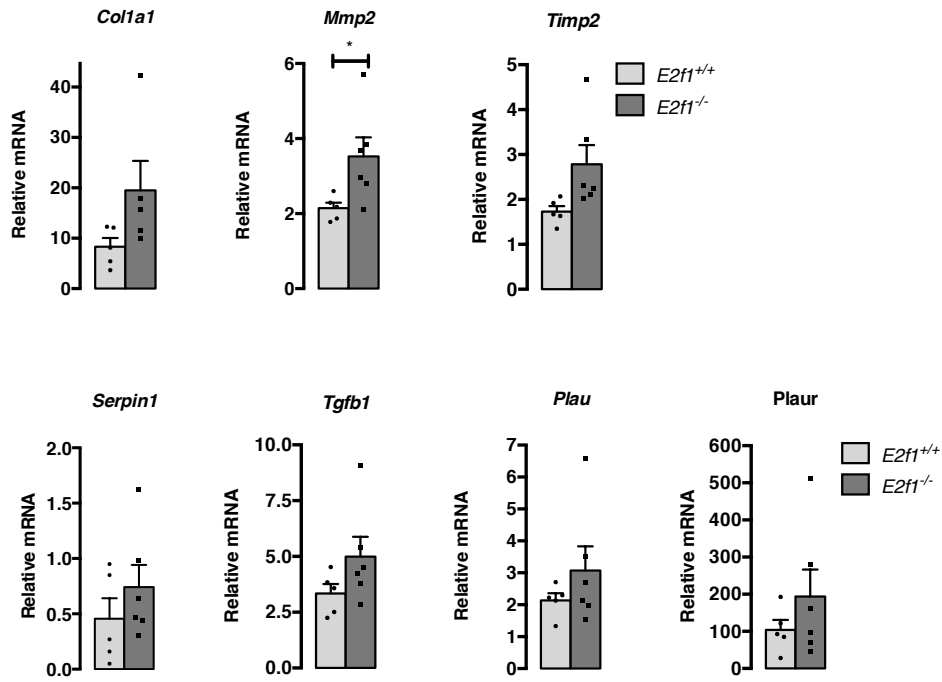

**Supplemental Figure 10:** Liver gene expression of  $E2f1^{+/+}$  and  $E2f1^{-/-}$  mice after 5 weeks of HCD. Differences between  $E2f1^{+/+}$  and  $E2f1^{-/-}$  were determined by 2-tailed unpaired t-test. \*P < 0.05.

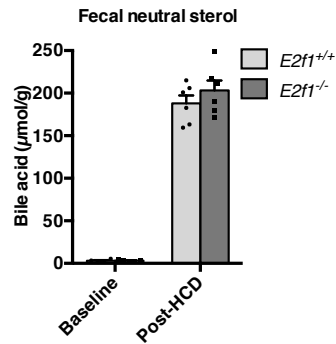

**Supplemental Figure 11:** Fecal neutral sterol quantification of  $E2f1^{+/+}$  and  $E2f1^{-/-}$  mice before and after five weeks of HCD. n=4-6 samples per group. Differences between  $E2f1^{+/+}$  and  $E2f1^{-/-}$  were determined by 2-way ANOVA. \*\*P < 0.01.
